# Supplementary material for: Market Premium and Macroeconomic Factors as Determinants of Industry Premium: Evidence from Emerging Economies
Source: Hindawi journal article supplement (doi:10.1155/2021/5534856), 2021-01-01
Supplement: f1 [file 5534856.f1.docx]

**Appendix of the results (Total 6 pages)**

Table 1 Listed of non financial sectors and number of companies included in this study

| **Sectors** | **Listed Companies** | **Selected Firms** | **Selected %age** |
| --- | --- | --- | --- |
| Automobile and Parts | 15 | 14 | 93% |
| Beverages | 3 | 2 | 67% |
| Chemicals | 34 | 24 | 71% |
| Construction Materials (Cement) | 36 | 26 | 72% |
| Electricity | 17 | 11 | 65% |
| Electrical and Electronic Goods | 3 | 3 | 100% |
| Engineering | 10 | 9 | 90% |
| Fixed Line Telecommunication | 4 | 3 | 75% |
| Food Products | 53 | 47 | 89% |
| Health Care Equip and Services | 2 | 1 | 50% |
| Household Goods | 13 | 7 | 54% |
| Industrial Metal and Mining | 10 | 3 | 30% |
| Industrial Transportation | 4 | 2 | 50% |
| Multi-Utilities (Gas & Water) | 11 | 8 | 73% |
| Personnel Goods (Textiles) | 180 | 131 | 89% |
| Pharma & Biotech | 9 | 8 | 89% |
| Tobacco | 3 | 3 | 100% |
| Travel and Leisure | 5 | 4 | 80% |
| **Total** | **412** | **306** | **74%** |

| **Table 2. Descriptive Statistics of the Macroeconomic Variables** | | | | | | | |
| --- | --- | --- | --- | --- | --- | --- | --- |
|  | Mean | Median | Std. Dev. | Minimum | Maximum | Skewness | Kurtosis |
| T-Bill Rates | 0.0073 | 0.0078 | 0.0029 | 0.0008 | 0.0115 | -0.7598 | 2.6268 |
| Money Supply | 8.3500 | 8.3982 | 0.5741 | 7.3254 | 9.2626 | -0.1195 | 2.8447 |
| Indus Production | 4.5189 | 4.5834 | 0.2497 | 3.7872 | 4.8612 | -1.1497 | 3.5969 |
| Foreign D. Investment | 5.1159 | 5.2198 | 0.8814 | 2.9071 | 7.1554 | -0.3807 | 2.6964 |
| Inflation | 4.2945 | 4.2579 | 0.4078 | 3.7357 | 4.9008 | 0.1228 | 2.4914 |

| **Table 3. Descriptive Statistics of Non Financial Sectors** | | | | | | |
| --- | --- | --- | --- | --- | --- | --- |
| **Sectors** | **Mean** | **S.D** | **Min** | **Max** | **Skewness** | **Kurtosis** |
| Automobile and Parts | 0.002 | 0.090 | -0.247 | 0.235 | -0.143 | 3.077 |
| Beverages | 0.006 | 0.135 | -0.428 | 0.408 | 0.174 | 4.030 |
| Chemicals | -0.001 | 0.073 | -0.282 | 0.220 | -0.410 | 4.444 |
| Construction& Materials | -0.002 | 0.092 | -0.262 | 0.306 | 0.332 | 4.077 |
| Electronics& Electrical | 0.000 | 0.124 | -0.358 | 0.373 | 0.445 | 3.964 |
| Electricity | -0.007 | 0.097 | -0.370 | 0.409 | 0.460 | 6.019 |
| Engineering | 0.003 | 0.087 | -0.256 | 0.253 | 0.146 | 3.296 |
| Food Producer | 0.002 | 0.058 | -0.132 | 0.198 | 0.462 | 3.821 |
| Fixed Line Telecom | -0.009 | 0.120 | -0.567 | 0.345 | -0.137 | 5.354 |
| Health Care Equip | 0.002 | 0.299 | -1.713 | 1.602 | -0.008 | 6.66 |
| House Hold Goods | -0.004 | 0.064 | -0.225 | 0.186 | -0.029 | 4.338 |
| Industrial Metal&Mine | -0.003 | 0.093 | -0.377 | 0.340 | 0.170 | 5.795 |
| Industrial Transport | 0.019 | 0.152 | -0.437 | 0.751 | 0.780 | 6.864 |
| Multiutilities (Gas &water) | -0.004 | 0.122 | -0.528 | 0.377 | 0.189 | 5.540 |
| Pharma and Bio Tech | 0.007 | 0.071 | -0.160 | 0.178 | 0.174 | 2.763 |
| Personal Goods-Textile | -0.003 | 0.067 | -0.199 | 0.245 | 0.557 | 4.849 |
| Tobacco | 0.016 | 0.110 | -0.293 | 0.431 | 0.320 | 4.443 |
| Travel and Leisure | 0.005 | 0.089 | -0.419 | 0.287 | 0.042 | 6.710 |

| **Table 4 . The correlation matrix between macroeconomic variables and sectors portfolio** | | | | | |
| --- | --- | --- | --- | --- | --- |
| **Sectors** | **Inflation** | **Foreign D. Investment** | **Industrial Production** | **Money Supply** | **T. Bill Rate** |
| Automobile Parts | -0.02 | -0.09 | -0.08 | -0.01 | -0.25 |
| Beverages | 0.09 | 0.03 | 0.12 | 0.11 | -0.10 |
| Chemicals | -0.06 | -0.05 | -0.08 | -0.06 | -0.23 |
| Const& Material | -0.03 | -0.17 | -0.08 | -0.02 | -0.27 |
| Elect & Eltrc Goods | -0.04 | 0.03 | 0.01 | -0.01 | -0.19 |
| Electricity | 0.00 | -0.02 | -0.04 | 0.00 | -0.15 |
| Engineering | -0.06 | -0.04 | -0.05 | -0.04 | -0.29 |
| Food Producer | -0.08 | -0.10 | -0.10 | -0.08 | -0.26 |
| Fixed Line Telecom | -0.06 | -0.03 | -0.03 | -0.04 | -0.21 |
| Health Care Equipment | -0.00 | 0.01 | -0.02 | 0.00 | -0.06 |
| Household Goods | -0.00 | -0.09 | -0.10 | 0.01 | -0.24 |
| Indus Metal & Mining | -0.13 | -0.07 | -0.11 | -0.12 | -0.28 |
| Indus Transportation | -0.09 | -0.07 | -0.09 | -0.08 | -0.23 |
| Multi (Gas and water) | -0.07 | -0.09 | -0.06 | -0.07 | -0.18 |
| Pharma and Bio Tech | -0.01 | -0.14 | -0.08 | 0.00 | -0.26 |
| Personnel Goods (Textile) | 0.04 | -0.08 | -0.00 | 0.05 | -0.21 |
| Tobacco | 0.06 | -0.07 | 0.03 | 0.09 | -0.14 |
| Travel and Leisure | -0.12 | -0.09 | -0.12 | -0.11 | -0.28 |

**Table 5 Normality test of Sector Premium**

| Sector (Equity) premium is normal | Kolmogorov- Smirnov | P-value | Decision |
| --- | --- | --- | --- |
| 0.659 | 0.076 | Retain Null Hypothesis |

Table 6 Estimated Results of the each industry with macroeconomic variables

| **Industries** | **A-Automobile & Parts** | **B-Engineering** | **C-Beverages** | **D-Chemicals** | **E-Electric and Engineering Goods** | **F-Electricity** | **G-Food Producer** | **H-Fixed Line Tele Communication** |
| --- | --- | --- | --- | --- | --- | --- | --- | --- |
| **Variable** | **Coefficients** | **Coefficients** | **Coefficients** | **Coefficients** | **Coefficients** | **Coefficients** | **Coefficients** | **Coefficients** |
| **Constant** | 0.1579 | -0.1475 | -0.9749 | 0.0227 | -0.7112 | -0.0110 | 0.1065 | 0.1065 |
|  | (0.8994) | (-0.6853) | (-2.1422)* | (0.1682) | (-1.8490)** | (-0.0422) | (0.5910) | (0.5910) |
| **Market Premium** | 0.9944 | 0.6001 | 0.4976 | 0.7603 | 0.4995 | 0.9034 | 0.4024 | 0.4024 |
|  | (4.4522)* | (2.6018)** | (1.3956) | (5.4630)* | (1.2866) | (4.18)* | (2.4212)* | (2.4212)* |
| **T-Bills Rate** | -0.0308 | -0.0371 | -0.0593 | -0.0189 | -0.0938 | -0.0413 | -0.0527 | -0.0527 |
|  | (-2.1874)** | (-1.8061)* | (-1.77)*** | (-2.0326)* | (-2.9054)* | (-2.009)** | (-2.2089)* | (-2.2089)** |
| **Inflation** | -0.0775 | 0.0394 | 0.0668 | -0.0416 | -0.0892 | -0.1024 | 0.3305 | 0.3305 |
|  | (-2.2624)* | (1.0278) | (1.3635) | (-1.901)* | (-1.65)*** | (-2.4049)* | (1.4843) | (1.4843) |
| **Industrial Production** | 0.1286 | 0.0618 | 0.0826 | 0.0729 | 0.1112 | 0.2248 | -0.0289 | -0.0289 |
|  | (1.7962)*** | (0.6596) | (0.6092) | (1.74)*** | (0.7931) | (2.2553)** | (-0.3504) | (-0.3504) |
| **Money Supply (M2)** | -0.8665 | 0.0133 | 0.0029 | 0.0001 | 0.0688 | 0.0704 | 0.0500 | 0.0500 |
|  | (-1.0316) | (0.4259) | (0.0726) | (1.6778)*** | (1.4904) | (2.4628)* | (1.9097)** | (1.9097)** |
| **Foreign D. Investment** | 0.0291 | -0.1544 | -0.4472 | -0.1176 | -1.0770 | -0.6005 | -0.2304 | -0.2304 |
|  | (1.4060) | (-0.2128) | (-0.4162) | (1.67)*** | (-1.0605) | (-0.9430) | (-1.3093) | (-1.3093) |
| **R-squared** | 0.4259 | 0.3045 | 0.1227 | 0.6122 | 0.0970 | 0.2966 | 0.0929 | 0.0929 |
| **Adjusted R-squared** | 0.4027 | 0.2763 | 0.0871 | 0.5965 | 0.0603 | 0.2681 | 0.0571 | 0.0571 |
| **S.E. of regression** | 0.0703 | 0.0727 | 0.1236 | 0.0456 | 0.1215 | 0.0795 | 0.0559 | 0.0559 |
| **F-statistic** | 9.0663 | 4.3915 | 2.2897 | 8.8655 | 2.1289 | 3.2353 | 2.8565 | 2.8565 |
| **Prob(F-statistic)** | 0.0000 | 0.0004 | 0.0383 | 0.0000 | 0.0533 | 0.0051 | 0.0115 | 0.0115 |
| **J-statistic** | 6.8924 | 5.5931 | 8.4764 | 7.489354 | 7.7246 | 10.6247 | 11.4550 | 11.4550 |
| **Prob(J-statistic)** | 0.3309 | 0.6927 | 0.3884 | 0.484868 | 0.4608 | 0.2239 | 0.1772 | 0.1772 |
| **Durbin-Watson stat** | 2.1165 | 1.9370 | 1.7536 | 1.94136 | 2.0461 | 2.1143 | 1.8792 | 1.7792 |
| **LM serial correlation test** | 3.9529 | 0.8049 | 3.9328 | 0.1843 | 0.6260 | 2.2887 | 2.1507 | 1.2394 |
| **Prob (LM)** | 0.1386 | 0.6687 | 0.1400 | 0.9120 | 0.8931 | 0.3184 | 0.3415 | 0.5381 |

*Note: *(**)(***) Indicates that variable is significant at 1%(5%)(10%) level of significance.*

Table 7 Estimated Results of the each industry with macroeconomic variables

| **Sectors** | **A-Travel and Leisure** | **B-Tobacco** | **C-Pharma Bio Tech** | **D-Indus Transportation** | **E-Cements** | **F-House Hold Goods** | **G-Industrial Mining and Material** | **H-Textiles** |
| --- | --- | --- | --- | --- | --- | --- | --- | --- |
| **Variable** | **Coefficients** | **Coefficients** | **Coefficients** | **Coefficients** | **Coefficients** | **Coefficients** | **Coefficients** | **Coefficients** |
| **Constant** | -0.0317 | -0.0730 | -0.1708 | 0.2928 | -0.2137 | -0.0635 | 0.3486 | -0.4068 |
|  | (-0.1171) | (-0.2608) | (-0.7854) | (0.5918) | (-0.9564) | (-0.3229) | (1.4063) | (-1.9882)** |
| **Market Premium** | 0.5508 | 0.21634 | 0.5804 | 0.7957 | 0.9175 | 0.4876 | 0.8873 | 0.2861 |
|  | (1.9124)** | (0.5532) | (3.0842)* | (2.0183)** | (4.1494)* | (2.9634)* | (3.3554)* | (1.7460)*** |
| **T- Bill Rate** | -0.0386 | -0.0462 | -0.0499 | -0.0668 | -0.0459 | -0.0337 | -0.0346 | -0.0453 |
|  | (-1.9690)** | (-3.101)* | (-3.1103)* | (-1.736)*** | (-2.3841)* | (-2.3913)* | (-1.1366) | (-2.4568)* |
| **Inflation** | 0.0248 | -0.1447 | -0.0912 | 0.5348 | -0.0686 | -0.0732 | 0.4306 | -0.0638 |
|  | (0.6332) | (-2.654)* | (-2.7466)* | (1.2918) | (-1.9871)* | (-2.4413)* | (1.5391) | (-1.7773)*** |
| **Indus. Product. Index** | -0.0738 | -0.13425 | 0.1101 | 0.1087 | 0.0984 | 0.0978 | 0.1171 | 0.0364 |
|  | (-0.7490) | (-1.1751) | (1.6873)*** | (0.5855) | (1.2653) | (1.6514)*** | (1.0102) | (0.4571) |
| **Foreign Direct Investment** | 0.0170 | -0.60872 | 0.0001 | 0.0001 | 0.0262 | 0.0001 | 0.0252 | 0.0110 |
|  | (0.6087) | (-0.4389) | (1.6694)*** | (0.5541) | (1.0710) | (0.8014) | (0.5648) | (0.4089) |
| **Money Supply** | 0.3785 | 0.040566 | -0.9186 | -0.4114 | 0.0582 | -0.2474 | 0.3646 | 0.2228 |
|  | (2.2591)** | (1.2145) | (-1.4244) | (-1.2502) | (2.8574)* | (-0.4465) | (1.6836)*** | (0.3694) |
| **R-squared** | 0.0970 | 0.234428 | 0.2147 | 0.2747 | 0.4075 | 0.2017 | 0.2898 | 0.2167 |
| **Adjusted R-squared** | 0.0614 | 0.21445 | 0.1829 | 0.2460 | 0.3835 | 0.1693 | 0.2614 | 0.1853 |
| **S.E. of regression** | 0.0864 | 0.112004 | 0.0646 | 0.1310 | 0.0709 | 0.0582 | 0.0810 | 0.0611 |
| **F-statistic** | 4.0353 | 2.239027 | 6.0711 | 3.0925 | 9.9176 | 5.3564 | 5.8806 | 3.4226 |
| **Prob(F-statistic)** | 0.0009 | 0.04251 | 0.0000 | 0.0069 | 0.0000 | 0.0001 | 0.0000 | 0.0034 |
| **J-statistic** | 7.6165 | 1.6030 | 3.2744 | 13.4614 | 6.6135 | 10.7529 | 11.8187 | 12.1447 |
| **Prob(J-statistic)** | 0.4718 | 0.9523 | 0.9160 | 0.096929 | 0.5788 | 0.2161 | 0.1595 | 0.1449 |
| **D-Watson stat** | 1.9019 | 2.1584 | 1.9563 | 1.9643 | 1.8641 | 2.2460 | 2.1597 | 1.6989 |
| **LM serial correlation test** | 2.5002 | 3.9529 | 2.1076 | 0.4276 | 0.4257 | 2.2621 | 3.7971 | 2.7782 |
| **Prob (LM)** | 0.2865 | 0.1386 | 0.3486 | 0.8075 | 0.8082 | 0.3227 | 0.1498 | 0.2493 |

*Note: *(**)(***) indicates that variable is significant at 1%(5%)(10%) level of significant.*
